1 **TITLE**

2 High density of white-faced capuchins (*Cebus capucinus*) and habitat quality in the

3 Taboga Forest of Costa Rica

4

5 **RUNNING HEAD**

6 Capuchin density in the Taboga Forest

7

8 **AUTHORS AND AFFILIATIONS**

9 Elizabeth Tinsley Johnson<sup>1,2</sup>, Marcela E. Benítez<sup>1,3</sup>, Alexander Fuentes<sup>1</sup>, Celia R.

10 McLean<sup>1</sup>, Ariek B. Norford<sup>1,4</sup>, Juan Carlos Ordoñez<sup>1</sup>, Jacinta C. Beehner<sup>1,5,6</sup>, Thore J.

11 Bergman<sup>1,5,7</sup>

12

13 <sup>1</sup> Capuchins at Taboga Research Project, Taboga Forest Reserve, Costa Rica

14 <sup>2</sup> Department of Integrative Biology, Michigan State University, East Lansing, MI 48824

15 USA

16 <sup>3</sup> Department of Psychology, Georgia State University, Decatur, GA 30034 USA

17 <sup>4</sup> Department of Ecology and Evolution, Stony Brook University, Stony Brook, NY

18 11794 USA

19 <sup>5</sup> Department of Psychology, University of Michigan, Ann Arbor, MI 48019 USA

20 <sup>6</sup> Department of Anthropology, University of Michigan, Ann Arbor, MI 48019 USA

21 <sup>7</sup> Department of Ecology and Evolutionary Biology, University of Michigan, Ann Arbor,

22 MI 48019 USA

23

24 **ABSTRACT**

25 Across the globe, primate species and habitats are threatened by human activity. This is  
26 especially true for species found in tropical dry forests, which are widely distributed and  
27 comprise diverse habitats that remain largely unprotected. Evidence suggests that  
28 some primate species endemic to tropical dry forests may be more sensitive to  
29 anthropogenic disturbance than others, but our ability to predict primate abundance in  
30 the face of disturbance also depends on the specific variables for each site. Here, we  
31 consider the factors that explain the high density of white-faced capuchins (*Cebus*  
32 *capucinus*) found in the Taboga Forest, Costa Rica, a relatively small fragment of  
33 tropical dry forest surrounded by agricultural fields. Our analyses suggest that, for  
34 capuchins (and potentially for mantled howler monkeys, *Alouatta palliata*), the size and  
35 disturbance of a forest fragment may matter less than the composition and availability of  
36 key resources, like above-ground water. Group sightings for both species were higher  
37 near permanent water sources, but group sightings did not vary between edge and  
38 interior forest. These findings help explain why some primate species can flourish even  
39 alongside anthropogenic disturbance and thus carry important implications for  
40 conservation efforts. Smaller forest fragments, like Taboga, may be able to support high  
41 densities of some species because they provide a mosaic of habitats and key resources  
42 that buffer adverse ecological conditions. Future studies will assess the extent to which  
43 primates in the Taboga Forest rely on the canals versus the river and will consider how  
44 the high density of capuchins in Taboga influences ranging patterns, home range  
45 overlap, and the frequency and intensity of intergroup encounters.

46

47 **KEYWORDS**

48 Conservation, edge effect, fragmentation, tropical dry forest, *Cebus imitator*

49

50 **RESEARCH HIGHLIGHTS**

51 • Here we introduce a new white-faced capuchin study site in the Taboga Forest,  
52 Costa Rica, a fragmented tropical dry forest.

53 • Forest fragments like Taboga may support high primate densities because they  
54 provide a mosaic of habitats and key resources.

55

56 **ACKNOWLEDGEMENTS**

57 We are grateful to the following Costa Rican institutions for allowing us to work in the  
58 Taboga Forest since 2017: the Ministerio de Ambiente y Energía (MINAE), the  
59 Comisión Nacional para la Gestión de la Biodiversidad (CONAGEBIO), and the  
60 Universidad Técnica Nacional (UTN). We would also like to thank the following people:  
61 Dr. Susan Perry for guidance and support; Courtney Anderson and Jahmaira Archbold  
62 for skilled field assistance during our first year; and the students of UTN who assisted  
63 with data collection. Finally, we would like acknowledge the University of Michigan for  
64 their financial support. The authors have no conflicts of interest to declare.

65

## 66 INTRODUCTION

67 The majority of primate species across the globe are either under threat of extinction or  
68 experiencing population declines (Estrada et al., 2018). Non-human primate densities  
69 tend to decrease in unprotected areas, yet non-human primates (hereafter, “primates”)  
70 can nevertheless still flourish in areas of human activity, suggesting both a vulnerability  
71 and a resilience to anthropogenic disturbance (Cavada, Barelli, Ciolli, & Rovero, 2016).  
72 Some human activities (e.g., those contributing to climate change) tend to be more  
73 disruptive than others (e.g., habitat fragmentation), but different primate species also  
74 exhibit differential responses to each threat. Some species show remarkable behavioral  
75 flexibility and quickly adjust to new habitats, while others get pushed closer to extinction  
76 (Kulp & Heymann, 2015; Laurance et al., 2007; Ries, Fletcher, Battin, & Sisk, 2004).  
77 This variation is likely due to a number of factors, from species-specific characteristics  
78 (i.e., dietary breadth) to habitat characteristics (i.e., species richness). For example, in  
79 Bornean forests tree density predicts primate species richness much better than the  
80 degree of habitat disturbance does (Bernard et al., 2016). Understanding how species  
81 and habitat characteristics together contribute to resilience is critical for effective  
82 conservation efforts.

83

84 One key primate habitat that remains relatively understudied is the tropical dry forest.  
85 Tropical dry forests are widely distributed and diverse habitats that simultaneously  
86 support a number of endemic species while also experiencing significant anthropogenic  
87 disturbance (Dryflor et al., 2016; Miles et al., 2006). Despite warnings about the  
88 vulnerability of these habitats (e.g., Janzen, 1988), tropical dry forests worldwide remain

89 unprotected and understudied (Dexter et al., 2018). For example, over 90% of the  
90 tropical dry forests in North and Central America are vulnerable to anthropogenic  
91 disturbance (Miles et al., 2006). However, a variety of primate species are found in  
92 tropical dry forests, with some even continuing to flourish in fragments. Most notably,  
93 white-faced capuchins (*Cebus capucinus*), howler monkeys (*Alouatta palliata*), and  
94 spider monkeys (*Ateles geoffroyi*) are common sympatric species, yet they demonstrate  
95 markedly divergent responses to fragmentation and other forms of anthropogenic  
96 disturbance (e.g., Williams-Guillén, Hagell, Otterstrom, Spehar, & Gómez, 2013).  
97  
98 Understanding how different species respond to anthropogenic disturbance has  
99 important implications for conservation and reforestation efforts. This is especially true  
100 when it comes to tropical dry forests, which were once the predominant forest type on  
101 the west coast of Central America (Gillespie, Grijalva, & Farris, 2000). While spider  
102 monkeys are rarely found in small fragments (instead requiring large territories to  
103 support their frugivorous diet: Williams-Guillén et al., 2013), both capuchins and howlers  
104 can thrive there. As large-bodied omnivores, capuchins, in particular, can  
105 opportunistically exploit a broad array of plants and animals (Ford & Davis, 1992; Rose,  
106 1994; Panger et al., 2002; Perry 2012) and can adapt to anthropogenic disturbances  
107 that threaten many other species (i.e., showing neutral or even positive edge effects:  
108 Bolt et al., 2018 [*C. capucinus*]; surviving in fragmented habitats: Lins & Ferreira, 2019  
109 [*Sapajus flavius*]; Cunha, Vieira, & Grelle, 2006 [*C. sp.*]). However, certain factors may  
110 constrain capuchin densities. For example, low capuchin densities in Nicaraguan forest  
111 fragments have been attributed to human hunting, poaching, and the pet trade

112 (Williams-Guillén et al., 2013). In addition, capuchin populations in dry forests, where  
113 rainfall is scarce for months at a time, may be constrained by access to reliable above-  
114 ground water (Fedigan & Jack, 2001). Howler monkeys, in contrast, may be less reliant  
115 on above-ground water sources because of the high water content in the leaves in their  
116 diet (Fedigan & Jack, 2001). Moreover, howlers are expected to do well in disturbed  
117 habitats in general, and data tend to support this (i.e., showing neutral or positive edge  
118 effects: Bolt et al., 2018 [*A. palliata*]; Lenz, Jack, & Spironello, 2014 [*A. macconelli*];  
119 surviving in fragmented habitats: Asensio, Arroyo-Rodríguez, Dunn, & Cristóbal-  
120 Azkarate, 2009 [*A. palliata mexicana*]; Boyle & Smith, 2010 [*A. macconelli*]). Despite  
121 this resilience under certain circumstances howler monkeys can still be negatively  
122 impacted by fragmentation (Arroyo-Rodríguez & Dias, 2010; Horwich, 1998). For  
123 example, a 1976 census of howlers at Taboga suggested that the population was in  
124 decline, if not at a nadir (Heltne, Turner, & Scott, 1976).

125

126 Here, we studied plant and wildlife abundance in the Taboga Forest (hereafter,  
127 “Taboga”) of Costa Rica. Taboga presents an ideal opportunity to understand primate  
128 abundance in relation to habitat quality for a number of reasons. First, the Taboga  
129 Forest has an extremely high density of capuchins compared to other forests in the  
130 region (see Table 2). Second, the forest is relatively small (516 hectares) and irregularly  
131 shaped with a high proportion of edge to interior (almost 40%: Fig. 1). Third, the forest is  
132 dissected by a series of canals used in irrigation and has been completely surrounded  
133 by sugar cane and rice farmland for decades. Therefore, we are able to look at the long-  
134 term impacts of two types of human disturbance: habitat fragmentation and year-round,

135 artificial water sources. This is particularly important because Taboga is a tropical dry  
136 forest, where the dry season would normally limit the viability of many fauna that  
137 depend on above-ground water.

138

139 One of our primary goals is to estimate the density of white-faced capuchins in the  
140 forest (as well as the mantled howlers to serve as a comparison species). Specifically,  
141 we address the following questions: (1) What is the density of capuchins in Taboga, and  
142 how does this compare to other long-term sites with white-faced capuchins? To answer  
143 this, we first compare group size and home range size of known groups across long-  
144 term capuchin sites. (2) Does the large amount of edge habitat contribute to capuchin  
145 abundance at Taboga? To answer this, we next compare the plant composition of edge  
146 and interior forest. We predict higher species richness, mean diameter at breast height  
147 (DBH), and canopy coverage in interior compared to edge forest (Bolt et al., 2018).  
148 Third, we expect to find significant seasonal effects on canopy coverage, with lower  
149 coverage during the dry season. However, because capuchins have been shown to  
150 have neutral or even positive edge effects (e.g., Bolt et al., 2018), we expect to find no  
151 significant differences in species richness and mean DBH for tree species associated  
152 with capuchins (i.e., that capuchins use for food or fur-rubbing). Fourth, because of the  
153 long-term anthropogenic disturbance around Taboga, we expect to find significant  
154 differences in the species richness and DBH for indicator tree species associated with  
155 the first stage of forest succession in tropical dry forests (Kalacska et al., 2004).

156

157 Finally, we ask: (3) Do forest characteristics differentially affect capuchin as compared  
158 to howler abundance? We expect that both howler and capuchin monkeys will show  
159 neutral edge effects (Bolt et al., 2018). However, because Taboga is a tropical dry  
160 forest, we expect to find higher primate abundance within 100 m of reliable water  
161 sources (i.e., rivers and large canals), but this should mainly apply to capuchin groups,  
162 as howler monkeys are less dependent on above-ground water (Fedigan & Jack, 2001).

163

## 164 **METHODS**

### 165 *Study site and subjects*

166 We conducted this study at the Capuchins at Taboga research site, established in June  
167 2017 in la Reserva Forestal Taboga (the Taboga Forest Reserve; i.e., Taboga) in  
168 Guanacaste province, Costa Rica. The reserve was established in 1978 and contains  
169 296 hectares of largely tropical dry forest (~3 x 4 km), representing an important piece  
170 of the fragmented biological corridor connecting the Guanacaste Mountains to the  
171 Tempisque River Basin (Fig. 1). The Universidad Técnica Nacional (UTN) of Costa Rica  
172 operates an experimental farm of 702 hectares that encompasses the reserve along  
173 with agricultural land. The UTN farm consists of irrigated land dedicated to the  
174 cultivation of sugarcane (100 hectares), rice (30 hectares), and grass for cattle (4.5  
175 hectares). There is also a tilapia farm and research center as well as a water research  
176 laboratory. As such, Taboga is characterized by distinct forest edges (i.e., farm land and  
177 roads) as well as more transitional or “natural” forest edges (i.e., canals and rivers). The  
178 reserve is almost exclusively bordered by sugarcane and rice fields, aside from a 2 km  
179 perimeter that borders private forested land and 1 km bordering public forested land.



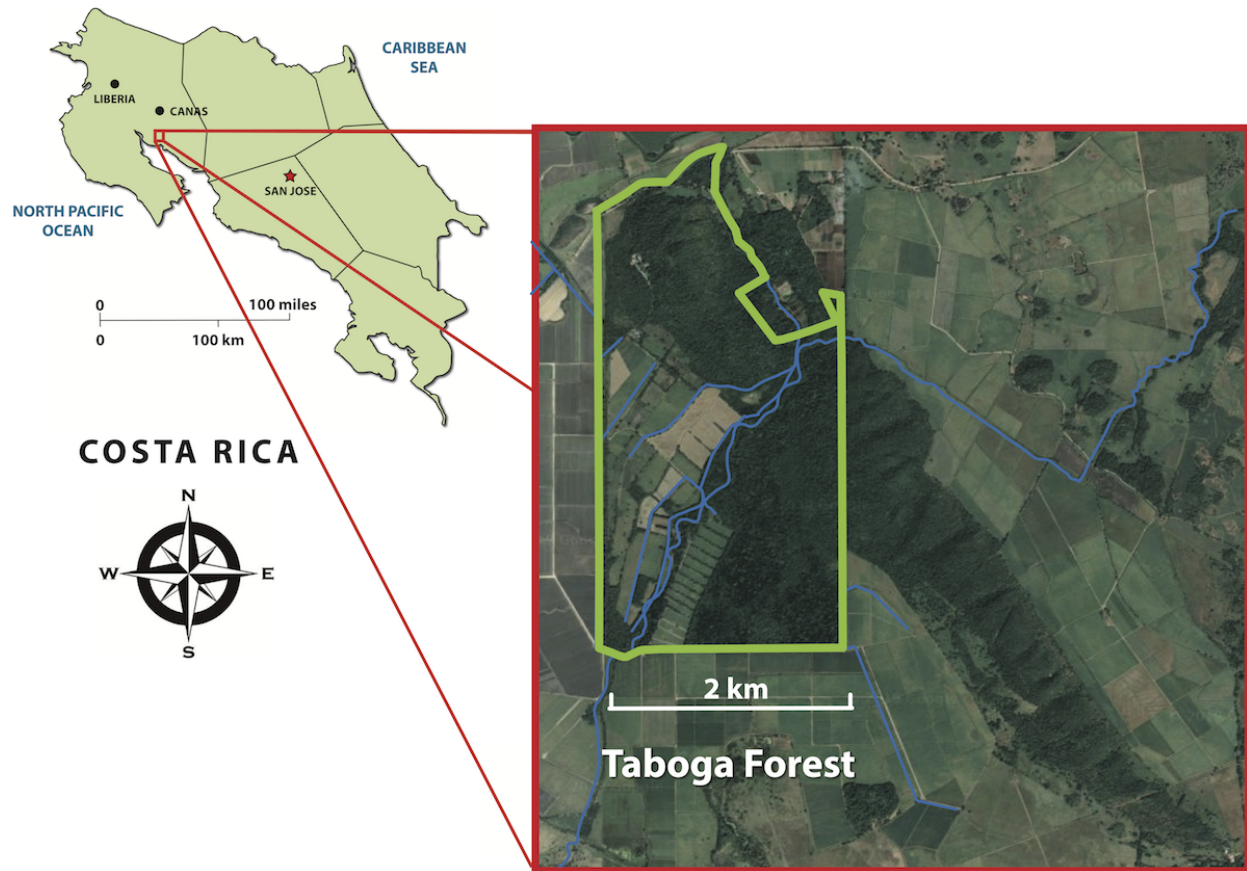

**Figure 1.** Location of the Taboga Forest in Costa Rica. The official Taboga Forest Reserve boundary is within this larger reserve held by the Universidad Técnica Nacional (see Fig. 3a). However, for simplicity, we refer to this entire area as the Taboga Forest or “Taboga”.

180

181

182 Taboga is largely characterized by seasonally dry tropical forest, a highly threatened

183 ecosystem that features a closed canopy and seasonal deciduousness (Janzen, 1988;

184 Miles et al., 2006). In addition to the dry forest, there are also riparian, semi-deciduous

185 forests around the river and a palm forest dominated by the native species *Attalea*

186 *rostrata*, part of which becomes inundated during the wet season. The area experiences

187 two distinct seasons (Fig. 2): a hot, dry season from Nov-Apr (mean daily maximum

188 temperature = 35.38 °C +/- 0.20 SE; mean daily rainfall = 0.66 mm +/- 0.27 SE) and a

189 cooler wet season from May-Oct (mean daily maximum temperature = 32.57 °C +/- 0.21

190 SE; mean daily rainfall = 8.93 mm +/- 1.09 SE). Mean daily minimum temperatures  
191 remain consistent throughout the year (dry season: 26.25 °C +/- 0.10 SE; wet season:  
192 25.46 °C +/- 0.11 SE). The river provides fresh water year-round and many of the  
193 canals used by the UTN farm for irrigation are consistently full during the dry season  
194 (Fig. 3C).

195

196

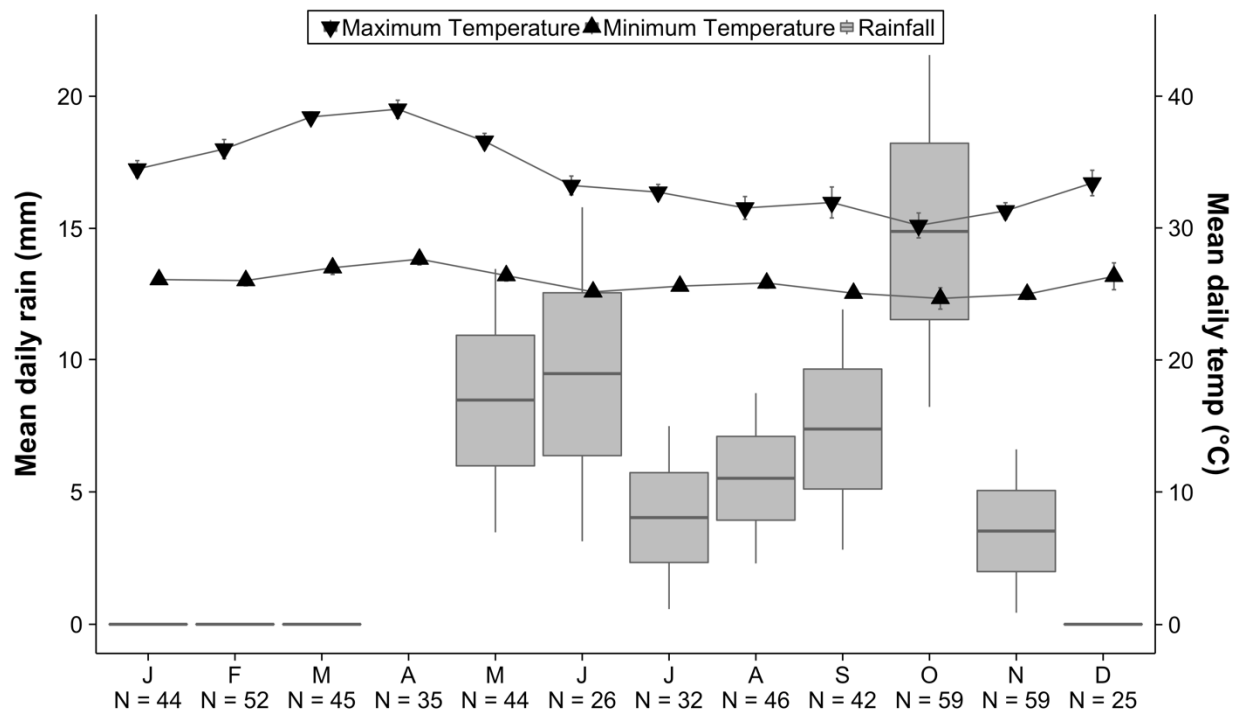

**Figure 2.** Temperature (black triangles) and rainfall (grey boxes) data from the Taboga Forest from Jul 2017 - May 2019. Numbers along the x-axis indicate the number of days of weather data measured per month.

197

198

199 The Capuchins at Taboga research project (directed by Thore Bergman, Jacinta  
200 Beehner, Marcela Benítez, Elizabeth Tinsley Johnson) is focused on the behavioral  
201 biology, endocrinology, and cognition of wild white-faced capuchins (*C. capucinus*).  
202 Note that the taxonomy of Central American capuchins is in flux and some authors refer  
203 to Costa Rican capuchins as *C. capucinus imitator* (Ruiz-Garcia et al., 2012; Lynch  
204 Alfaro et al., 2014; Melin et al., 2017; Hogan et al., 2018). However, we prefer the more  
205 general name *C. capucinus* because the defining feature of the capuchins first  
206 described as “imitator” is a frontal tuft in females, something that is clearly absent in our  
207 populations (Thomas, 1903). Our research group has identified at least 12 distinct  
208 capuchin groups in the reserve since July 2017. We collect GPS data on group  
209 movements and behavioral data on three of these groups (“Tenori”, “Mesas”, and  
210 “Palmas”), including regular group scans (all groups) and weekly focal follows of each  
211 individual (in Tenori group and some individuals in Mesas group). Whenever possible,  
212 groups are followed from their morning sleeping site to their evening sleeping site. The  
213 Tenori group is entirely habituated to observers on foot, and the Mesas and Palmas  
214 groups are mostly habituated. These three groups range in size from 16 (Mesas) to 17  
215 (Tenori) to 36 individuals (Palmas). The breakdown of age / sex categories can be  
216 found in Table 1.  
217

218

**Table 1.** Group size and composition for three habituated white-faced capuchin groups

| <b>Group</b>  | <b>Adult males</b> | <b>Adult females</b> | <b>Subadults and juveniles</b> | <b>Infants</b> | <b>Total</b> |
|---------------|--------------------|----------------------|--------------------------------|----------------|--------------|
| <b>Mesas</b>  | 2                  | 4                    | 6                              | 4              | 16           |
| <b>Tenori</b> | 3                  | 4                    | 7                              | 3              | 17           |
| <b>Palmas</b> | 5                  | 8                    | 12                             | 4              | 29           |

219

220

221 *Ranging data*

222 We collected ranging data for three capuchin groups (Tenori, Mesas, and Palmas)  
223 between Jan 2018 and Apr 2019 (Fig. 3d). We spent a total of 1482 hours (220  
224 observation days) with Tenori, 481 hours (72 days) with Mesas, and 486 hours (81  
225 days) with Palmas. Observers recorded group locations on handheld GPS units  
226 (Garmin eTrex 10 and 20) using the “track” function, which marks a point every 10 m or  
227 10 sec, whichever comes first. When observers lost sight of their group they turned the  
228 track function off. Location data were uploaded to Google Earth Pro version 7.3.2.5776  
229 (Google LLC 2019) and used to create convex polygons encompassing each group’s  
230 home range. All three group range polygons contained areas not traversed by the  
231 monkeys (agricultural fields, buildings, and cattle pasture) that were excluded from the  
232 polygon area measures (Di Bitetti, 2001). The river area was conserved in ranging area,  
233 as canopy cover is generally continuous over the river and the capuchins crossed it  
234 freely.

235

236 *Vegetation survey*

237 From Jul-Nov 2018 (wet season), we conducted a vegetation survey of the reserve to  
238 examine edge and interior forest habitats (Fig 3b-c). Edge forest was defined as forest  
239 within 100 m of a forest boundary (following (Bolt et al., 2018). Edges in this forest were  
240 created by agricultural and cattle pasture fields, land cleared for buildings, and various  
241 roads that traverse the reserve. Transects were dispersed randomly within edge (n =  
242 20) and interior (n = 20) forest using a random number generator selecting numbers  
243 associated with points on a grid overlaid on a map of Taboga. Each 50 m transect was  
244 walked in a random direction selected by a spin of a compass bezel. If the direction  
245 selected did not allow for a full 50 m transect, then the opposite direction was chosen.

246

247 Along each transect and within 2.5 m of either side of the transect, we recorded the  
248 species and diameter at breast height (DBH) of every tree with a circumference at  
249 breast height >10 cm (FAO, 2004). We recorded canopy coverage on a scale from 1-4  
250 (1 = 1-25% coverage; 2 = 26-50%; 3 = 51-75%; 4 = 76-100%) every meter along the  
251 transect line, first during the wet season (Jul-Nov 2018) and again during the dry  
252 season (Mar-Apr 2019).

253

254 For each transect, we calculated the following: mean DBH, mean canopy cover (wet  
255 and dry season), density (trees/m<sup>2</sup>), species richness (S, i.e., the number of tree  
256 species), and Shannon's Diversity Index (H, which accounts for both species richness  
257 and the distribution of individuals across the species represented in the sample:

258 Shannon & Weaver, 1949; Spellerberg, 2005). To determine whether forest edges  
259 contained more resources for capuchins and to quantify the stage of forest regeneration  
260 seen along the edges, we also categorized tree species into two groups: (1) those used  
261 by capuchins for foraging or fur rubbing, and (2) those characteristic of the early stage  
262 of successional forests (following Kalacska et al., 2004); see Table S1). Then, for each  
263 group (edge vs. interior), we calculated mean DBH, density, species richness, and  
264 Shannon's Diversity Index.

265

266 Finally, for ease of comparison across sites, we calculated overall mean Shannon's  
267 diversity index and Shannon's equitability ( $J'$ , i.e., the distribution of individuals across  
268 the species in a sample: DeJong, 1975; Pielou, 1969). Shannon's equitability ranges  
269 from 0-1, with 0 indicating an uneven distribution and 1 an equitable distribution of  
270 species (DeJong, 1975; Pielou, 1969; see Table S2).

271

### 272 *Vegetation survey analyses*

273 First, we examined whether there were vegetation differences between edge and  
274 interior forest types. Because our data were not normally distributed, we used Mann-  
275 Whitney U tests to compare edge and interior transects with respect to mean DBH,  
276 density (trees/m<sup>2</sup>), species richness (S), and Shannon's Diversity Index (H). Identical  
277 comparisons were conducted: (1) after restricting species to those used by capuchins  
278 for foraging and locomotion, and (2) after restricting species to those characteristic of  
279 the early stage of successional dry forests (Kalacska et al., 2004; see Table S1).

280 Second, to test whether canopy cover varied between edge and interior forest and/or if

281 canopy cover changed seasonally, we fit a linear mixed model with transect location  
282 (edge or interior), season (wet or dry), and the interaction between the two as fixed  
283 effects. We controlled for transect number as a random effect and log transformed  
284 canopy cover as the dependent variable.

285

### 286 *Primate survey*

287 Between Feb-Apr 2019, we conducted a primate population survey using 32 line  
288 transects comprising pre-existing roads and paths (i.e., along canals or firebreaks) and  
289 a network of trails created by the project (19 cut trails total, each at least 0.2 km apart;  
290 Fig. 3b). Transect lengths ranged from 0.2 km to 2.2 km and we walked most transects  
291 twice (once in the morning between 6:00-10:00 and once in the afternoon between  
292 14:00-16:00), each time in an alternate cardinal direction, for a total of 55 km in  
293 transects. Three transects were only walked once due to lack of maintenance.  
294 Transects were not surveyed when it was raining.

295

296 Transects were walked by teams of observers (typically 2 and no more than 5), traveling  
297 at a speed of 1.5 km/h and stopping every 100 m for 2 min of detailed observation (Bolt  
298 et al., 2018; Pruetz & Leason, 2002). When more than one team searched on the same  
299 day, teams walked transects that were more than 0.2 km apart to avoid double-counting  
300 primate groups. Upon encountering a primate group (defined here as sighting one or  
301 more individuals), observers recorded the time of day, primate species, and location  
302 (using a Garmin eTrex 10 or 20 handheld GPS unit). Observers paused for 10 min to

303 count individuals of each age/sex class, when possible, and then returned to the  
304 transect.

305

306 *Primate survey analyses*

307 We then determined whether observations of primate groups were more likely in  
308 different forest type (i.e., edge vs. interior; Fig. 3c) or proximity to a permanent water  
309 source (i.e., <100 m vs. >100 m; Fig. 3c). For each species of monkey (i.e., capuchins,  
310 howlers), we fit a generalized linear mixed model where the dependent variable was the  
311 number of observations of primate groups for each species. We assumed the number of  
312 encounters on each transect followed a Poisson distribution whose log mean depended  
313 on forest type and proximity to water as fixed effects and transect number as a random  
314 effect. We also added a constant offset term to each model to account for different  
315 research effort on transects of different lengths.

316

317 We fit all the models with the lme4 package (Bates et al., 2015) in R version 3.3.2 (R  
318 Core Team, 2016; RStudio Team, 2016). Figures were created using the ggplot2  
319 package (Wickham, 2009).

320



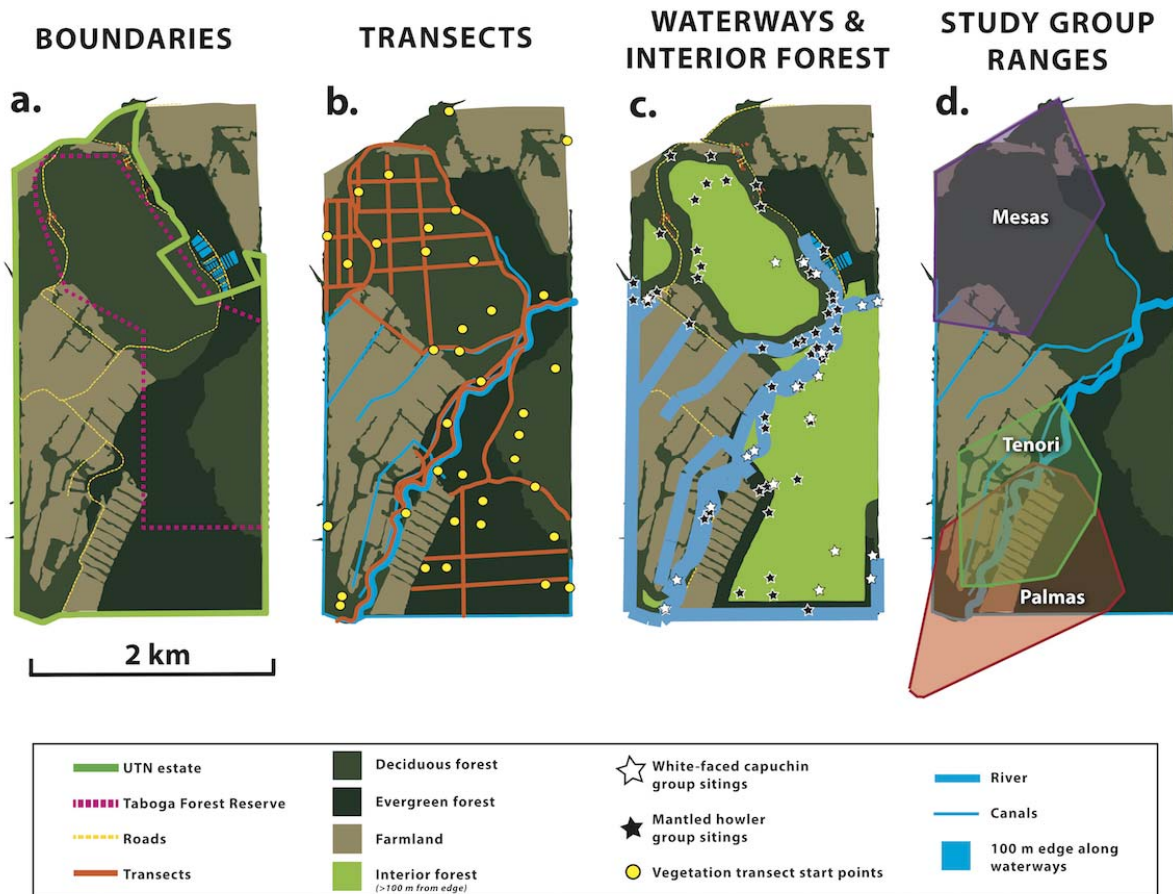

**Figure 3a-d.** Maps of (a) the UTN Estate and the Taboga Forest Reserve (together, the “Taboga Forest”), with overlays displaying: (b) both primate and vegetation transect locations, (c) 0.1 km buffer zones for forest edges and year-round water sources, and (d) home ranges for three groups of wild white-faced capuchins.

321

322

## 323 RESULTS

### 324 *Capuchin density and home range size*

325 The density of capuchins in the Taboga Forest is higher than that reported from all other  
326 long-term white-faced capuchin sites (Table 2). This high density emerges whether we  
327 use the mean group and homerange size from individual groups (21.65 individuals /  
328 km<sup>2</sup>) or the total population and total useable area (36.17 individuals / km<sup>2</sup>). For other

329 sites, the group-based estimates range from 7.97-12.93 individuals / km<sup>2</sup>; and the total  
330 population-based estimates range from 5.60-20.00 individuals / km<sup>2</sup> (Table 2).

331 Therefore, with the exception of BCI, the Taboga population is 2-6 times more dense  
332 than other white-faced capuchin sites. Moreover, we believe the total estimate from the  
333 Taboga Forest is a conservative estimate because we suspect that several capuchin  
334 groups were not censused during our primate surveys (the forest continues into private  
335 land that we are not allowed to survey). We estimate that there are three additional  
336 capuchin groups here that also range into the Taboga Forest.

337

338 With respect to our habituated groups, Tenori had the smallest range size (60.5 ha,  
339 70% of which was “edge” habitat) in comparison with Mesas (129.4 ha, 60% edge) and  
340 Palmas (102.1 ha, 57% edge) groups (Fig. 3d). We do not yet have accurate estimates  
341 of how much our capuchin groups overlap. We will soon have data from another group  
342 (Escameka group) that overlaps with the Mesas group, providing us with two points of  
343 overlap (Tenori and Palmas groups, and Mesas and Escameka groups).

344

345

346 **Table 2.** Group size and density comparison for this (“Taboga”) and other white-faced  
347 capuchin sites.

| Site                   | Description      | Individuals | km2   | Individuals / km2 | Source                                   |
|------------------------|------------------|-------------|-------|-------------------|------------------------------------------|
| Lomas                  | Mean (3 groups)  | 29.00       | 3.64  | 7.97              | Vogel, 2004                              |
| Lomas                  | Total population | 216.00      | 36.99 | 5.84              | Perry, pers comm                         |
| Palo Verde             | Total population | -           | -     | 9.40              | Panger et al., 2002                      |
| Santa Rosa             | Mean (7 groups)  | 20.10       | 1.98  | 10.15             | Campos et al. 2014, Fedigan & Jack 2012  |
| Santa Rosa             | Total population | 673.00      | 57.70 | 11.66             | Campos, pers comm                        |
| BCI                    | Mean (4 groups)  | 15.00       | 1.16  | 12.93             | Crofoot, 2007                            |
| BCI                    | Total population | 300.00      | 15.00 | 20.00             | Crofoot, 2007                            |
| BCI (after 2010 crash) | Total population | 84.00       | 15.00 | 5.60              | Milton & Giacalone, 2014                 |
| Taboga                 | Mean (3 groups)  | 21.00       | 0.97  | 21.65             | Tinsley Johnson et al., this publication |
| Taboga                 | Total population | 187.00      | 5.17  | 36.17             | Tinsley Johnson et al., this publication |

348

349

350 *Vegetation survey*

351 Contrary to our predictions, we found no significant differences in the interior and in the  
352 edge for mean tree DBH (Mann Whitney U; U = 185.5,  $p = 0.70$ ; Table 3), mean tree  
353 species richness (U = 234.5,  $p = 0.37$ ; Table 3), mean tree density (U = 203.5,  $p = 0.94$ ;  
354 Table 3), or Shannon's Diversity Index (U = 244,  $p = 0.24$ ; Table 3). In comparing just  
355 trees used by capuchins, we again found no significant differences due to transect  
356 location for mean tree DBH (Mann Whitney U; U = 185,  $p = 0.70$ ; Table 3), mean tree  
357 species richness (U = 264.5,  $p = 0.08$ ; Table 3), mean tree density (U = 241,  $p = 0.27$ ;  
358 Table 3), or Shannon's Diversity Index (U = 264,  $p = 0.09$ ; Table 3). For indicator trees,  
359 we found that trees on the edge had a significantly greater DBH than indicator trees in  
360 the interior (Mann-Whitney U; U = 274,  $p = 0.046$ ; Table 3). We found no difference  
361 between edge and interior forest for mean indicator species richness (U = 144.5,  $p =$

362 0.132; Table 3), mean tree density ( $U = 234.5$ ,  $p = 0.36$ ; Table 3), or Shannon's  
 363 Diversity Index ( $U = 153$ ,  $p = 0.20$ ; Table 3).

364

365 **Table 3.** Mean  $\pm$  standard error of vegetation measures in the edge and interior of all  
 366 trees, monkey food trees, and indicator tree species. Bold indicates significant  
 367 differences between edge and interior, \* denotes  $p < 0.05$ .

|                                      | Overall          |                  | Monkey Food Trees |                  | Indicator Trees                    |                                      |
|--------------------------------------|------------------|------------------|-------------------|------------------|------------------------------------|--------------------------------------|
|                                      | Edge             | Interior         | Edge              | Interior         | Edge                               | Interior                             |
| <b>DBH (cm)</b>                      | 12.53 $\pm$ 1.31 | 14.30 $\pm$ 1.72 | 12.85 $\pm$ 1.31  | 15.23 $\pm$ 1.96 | <b>16.21 <math>\pm</math> 1.55</b> | <b>11.30 <math>\pm</math> 1.72 *</b> |
| <b>Density (trees/m<sup>2</sup>)</b> | 0.13 $\pm$ 0.01  | 0.15 $\pm$ 0.03  | 0.08 $\pm$ 0.01   | 0.07 $\pm$ 0.04  | 0.03 $\pm$ 0.01                    | 0.08 $\pm$ 0.03                      |
| <b>Richness</b>                      | 12.30 $\pm$ 1.01 | 11.15 $\pm$ 1.23 | 7.40 $\pm$ 0.61   | 6.90 $\pm$ 1.50  | 3.00 $\pm$ 0.61                    | 4.45 $\pm$ 0.72                      |
| <b>Diversity index (H)</b>           | 2.10 $\pm$ 0.11  | 1.89 $\pm$ 0.14  | 1.65 $\pm$ 0.12   | 1.34 $\pm$ 0.13  | 0.67 $\pm$ 0.15                    | 0.99 $\pm$ 0.17                      |

368

369

370 We found that in the dry season, interior transects had significantly less canopy cover  
 371 than edge transects (Interior x Wet season; Beta = 0.42, SE = 0.17,  $p = 0.020$ ). We  
 372 found that there was more canopy coverage in the wet season months than in the dry  
 373 season (GLM; Wet Season, Beta = 0.31, SE = 0.12,  $p = 0.014$ ). We also found a  
 374 significant effect of edge over the interior (Interior, Beta = -0.44, SE = 0.13,  $p = 0.001$ ;  
 375 Fig. 4). In other words, the edge forest is able to better maintain its canopy cover  
 376 throughout the dry season, while the interior forest does not, following a typical  
 377 deciduous pattern where trees lose their leaves during the dry season.

378

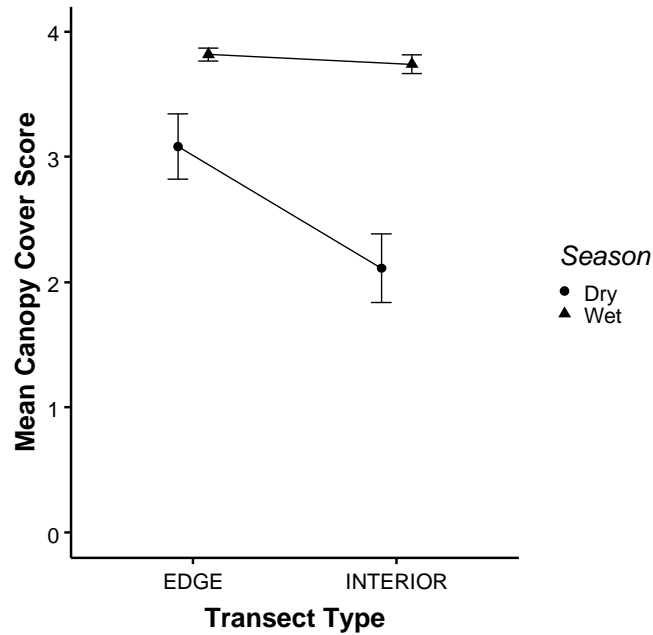

**Figure 4.** Mean canopy cover score ( $\pm$  standard error) across season and transect type.

379

380

381 *Population survey*

382 As predicted, both capuchins and howlers showed neutral edge effects (i.e., no  
383 significant difference between group encounter rates in edge vs. interior forest).

384 Capuchin encounter rates were lower overall (compared to howler encounters) and did  
385 not differ between edge (0.34 groups/km; CI: -2.10, 0.48) and interior forest (0.46  
386 groups/km; CI: -0.48, 2.10;  $p = 0.25$ ; Fig. 5a). Although there was a higher encounter  
387 rate for howlers in edge (1.31 groups/km; CI: -0.38, 0.85) compared to interior forest  
388 (0.75 groups/km; CI: -0.85, 0.38; Fig. 5c), this difference was not significant ( $p = 0.43$ ).

389

390 As predicted, capuchin group encounters were higher near permanent water sources  
391 (i.e., the river or large canals: 0.78 groups/km; CI: 1.42, 4.41) compared to farther from  
392 water (0.15 groups/km; CI: -4.41, -1.42;  $p = 1.73 \times 10^{-4}$ ; Fig. 5b). Contrary to our  
393 predictions, however, howler group encounter rates were also significantly higher near  
394 water sources (1.69 groups/km; CI: 0.42, 1.72) compared to farther from water (0.57  
395 groups/km; CI: -1.72, -0.42;  $p = 1.24 \times 10^{-3}$ ; Fig. 5d).  
396

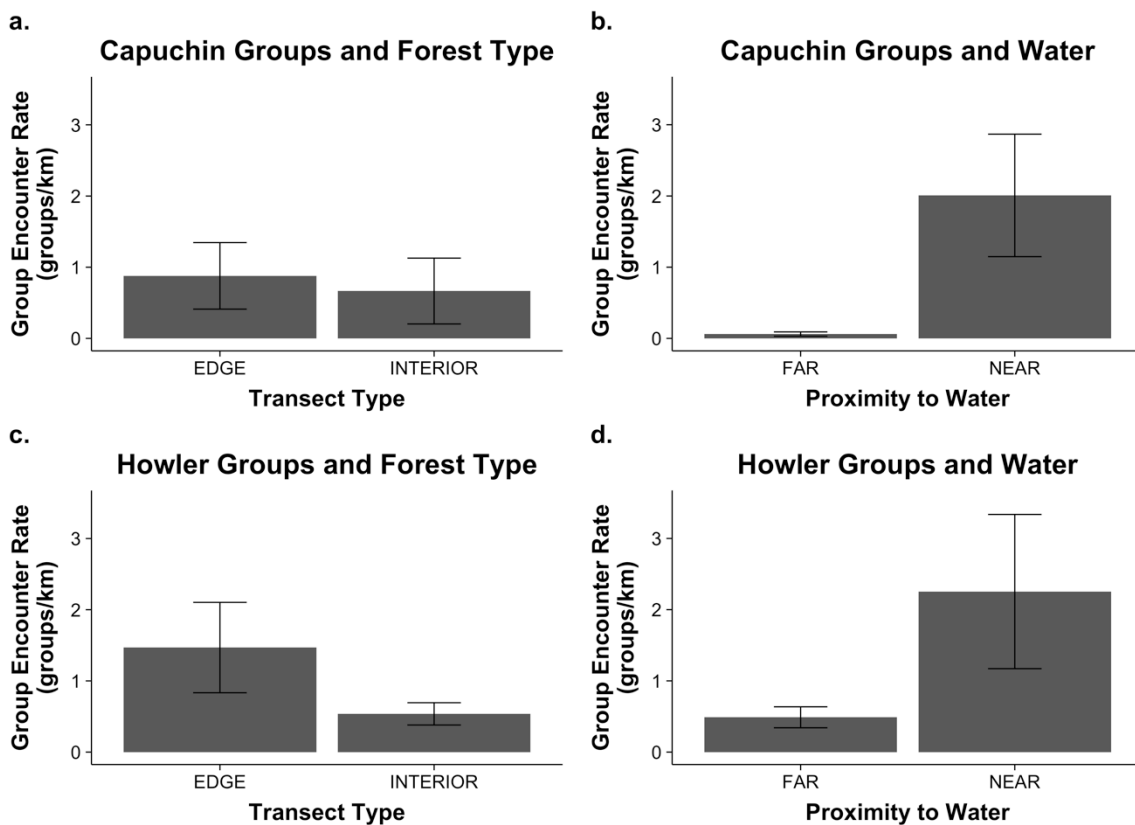

**Figure 5a-d.** Mean group encounter rate (groups/km walked  $\pm$  standard error) by forest type in Taboga. **(a)** capuchin groups in edge and interior forest; **(b)** capuchin groups near (<0.01 km) or far (>0.01 km) from a permanent water source; **(c)** howler groups in edge and interior forest; **(d)** howler groups near and far from a permanent water source.

397

398

399 **DISCUSSION**

400 The Taboga Forest of Costa Rica has one of the highest densities of white-faced  
401 capuchins thus far recorded. Here, we asked whether specific features of the forest  
402 might allow these capuchins to survive and reproduce at such high densities. Our  
403 results suggest that the presence of reliable year-round water sources is critical for  
404 capuchins (and possibly for howlers) living in a seasonally dry habitat. For example,  
405 capuchins in Santa Rosa National Park (another tropical dry forest in Costa Rica) rely  
406 on a limited number of water holes during the dry season, and access to these water  
407 holes is thought to be the primary constraint on the capuchin population (Fedigan &  
408 Jack, 2001; Fedigan, Rose, & Avila, 1996, 1998). In contrast, Taboga has two types of  
409 year-round water supply: the river and a system of canals. We did not test whether  
410 forest characteristics varied significantly according to distance from water sources.  
411 However, because the canals have cement bottoms, we think that it is unlikely that the  
412 canals impact the surrounding flora all that much. We will implement future studies to  
413 test how forest characteristics vary with proximity to the river (and the associated  
414 riparian/semi-deciduous forest type). For example, riparian forests may contain certain  
415 fruiting trees central to the capuchin diet, overall larger trees due to year-round water  
416 supply, and/or year-round canopy cover. Our results also suggest that howlers at  
417 Taboga may be more dependent on permanent water sources than at other sites, as  
418 they were also frequently found near permanent water sources. However, this may have  
419 more to do with the forest subtype near the river (i.e., evergreen and riparian) than the  
420 need to drink water daily (Fedigan & Jack, 2001).  
421

422 In line with previous research that found neutral edge effects for both species (e.g., (Bolt  
423 et al., 2018), we found no difference between capuchin (or howler) group encounter  
424 rates when we compared edge vs. interior forest. Combined with the overall high  
425 capuchin population density, this suggests that despite a large percentage of edge  
426 forest (nearly 40% of the 516 hectares), capuchins appear to thrive in forest fragments  
427 (Cunha et al., 2006). Indeed, we found that capuchins were equally likely to find staple  
428 food and fur-rubbing species in the edge compared to the interior forest and that the  
429 size of these staple species (i.e., DBH) did not vary significantly between edge and  
430 interior. Other features of the forest, like canopy height (Fleagle & Mittermeier, 1980)  
431 and canopy cover (Fedigan & Jack, 2001) have been useful in explaining forest use by  
432 other primate taxa. Although we did not record canopy height in this study, we found  
433 that the DBH for our trees did not differ from the edge to the interior. Canopy cover  
434 showed a very different pattern though. The edge forest in Taboga maintained canopy  
435 cover even throughout the dry season, while the interior forest was more deciduous (we  
436 expand on possible reasons for this below). For primates, semi-evergreen forest can  
437 provide shade and may stay cooler through the hottest months (Fedigan & Jack, 2001;  
438 Fedigan et al., 1996), and therefore both capuchins and howlers might spend more time  
439 in edge forest during the dry season (when our primate survey took place) than they do  
440 during the wet season. Longitudinal data will determine whether ranging patterns vary  
441 seasonally.

442

443 Together, our data suggest that the difference between edge and interior forest at

444 Taboga is less than that from other sites (e.g., Arroyo-Rodríguez & Mandujano, 2009;



445 Bolt et al., 2018; Harris, 1988; Lehman, Rajaonson, & Day, 2006; Saunders, Hobbs, &  
446 Margules, 1991). This may be because the initial anthropogenic disturbance (i.e.,  
447 creation of pastures and croplands around the reserve) happened some time ago and  
448 the forest is actually in the intermediate stages of regeneration (Kalacska et al., 2004).  
449 Three lines of evidence support this hypothesis. First, both edge and interior forest at  
450 Taboga exhibit high species richness and diversity, which also characterize  
451 intermediate tropical dry forest succession at nearby Santa Rosa (Kalacska et al.,  
452 2004). Second, tree species that characterize the first stage of tropical dry forest  
453 succession (of which many remain through stages 2 & 3) are well-established in the  
454 forest edge. Specifically, these trees had a significantly higher mean DBH in edge forest  
455 compared to interior forest. Third, the early stages of dry forest succession are  
456 characterized by a high percentage of deciduous trees (Kalacska et al., 2004). Yet, we  
457 found that the edge forest in Taboga was semi-evergreen throughout the dry season.  
458 This, of course, raises the question of why the interior forest is more deciduous. It may  
459 be that the Taboga Forest is small enough that it lacks a true “interior” (Banks-Leite,  
460 Ewers, & Metzger, 2010), and therefore the entire forest represents different stages of  
461 regeneration. Alternatively, much of the interior forest is also more elevated and may  
462 lack year-round water sources. Finally, flood-irrigation of agricultural land during the dry  
463 season might spill-over into edge forests, thus allowing for year-round canopy  
464 maintenance.

465

466 Our survey indicates that the Taboga Forest is actually composed of at least three  
467 distinct forest types: (1) the deciduous tropical dry forest that extends from the North

468 boundary of the farm down to the river, (2) the riparian semi-deciduous forest that  
469 follows the river, and (3) a moist palm forest that retains canopy cover year-round.  
470 Future studies should distinguish between these subtypes to test how different  
471 microclimates alter edge effects. In addition, the severity of edge effects on forest  
472 composition can vary according to the type of disturbance (i.e., road, pastureland, sugar  
473 cane/rice plantation, etc.). Thus, the universal 100 m buffer used here may not apply  
474 equally to each forest type found in Taboga (Didham et al., 2015; Harper et al., 2005).  
475 For capuchins living in a highly seasonal environment, having distinct habitats may  
476 provide a buffer from extreme fluctuations in temperature and rainfall (indeed,  
477 preliminary data suggest group ranging varies significantly by forest type between  
478 seasons). For example, in 2010, a capuchin population crash on Barro Colorado Island  
479 was caused by unusually heavy rains that decimated the arthropod population (a key  
480 source of protein for capuchins) (Milton & Giacalone, 2014). In Taboga, the wet and  
481 evergreen forest may be less vulnerable to drought or El Niño events (e.g., Campos,  
482 Jack, & Fedigan, 2015), while the deciduous tropical dry forest may be less vulnerable  
483 to unusually heavy rains and flooding.

484

485 The abundance of the capuchins in Taboga has important implications for conservation  
486 efforts. For certain species, the size and disturbance of a forest fragment may matter  
487 less than the composition and availability of key resources, like above-ground water.  
488 Our analysis here adds to our understanding of factors that influence primate  
489 abundance, and also establishes Taboga as critical case study in tropical dry forest  
490 dynamics. Future studies will provide a more fine-grained analysis of the possible

491 interaction between edge effects, habitat type, and season, and how these factors  
492 influence primate sightings (Gogarten et al., 2012). For example, we were not able to  
493 test here whether primates prefer the river over human-made canals (or vice-versa),  
494 though we predict that howlers sightings may be more frequent along the river (i.e., that  
495 howlers prefer riverine habitat over others but do not necessarily need to be close to an  
496 above-ground water source). For capuchins, the next question is how the high density in  
497 Taboga influences ranging patterns, home range overlap, and the frequency and  
498 intensity of intergroup encounters (Perry, 1996; Perry 2012). Preliminary data suggest  
499 that intergroup encounters are higher at Taboga than at other sites, but that the intensity  
500 of such encounters is lower, which may represent a behavioral adaptation to frequent  
501 encounters.

502

503 **REFERENCES**

- 504 Arroyo-Rodríguez, V., & Dias, P. A. D. (2010). Effects of habitat fragmentation and  
505 disturbance on howler monkeys: a review. *American Journal of Primatology*,  
506 72(1):1-16.
- 507 Arroyo-Rodríguez, V., & Mandujano, S. (2009). Conceptualization and measurement of  
508 habitat fragmentation from the primates' perspective. *International Journal of*  
509 *Primatology*, 30:497–514.
- 510 Asensio, N., Arroyo-Rodríguez, V., Dunn, J. C., & Cristóbal-Azkarate, J. (2009).  
511 Conservation value of landscape supplementation for howler monkeys living in  
512 forest patches. *Biotropica*, 41(6):768-773.
- 513 Banks-Leite, C., Ewers, R. M., & Metzger, J.-P. (2010). Edge effects as the principal  
514 cause of area effects on birds in fragmented secondary forest. *Oikos*,  
515 119(6):918-926.
- 516 Bates, D., Maechler, M., Bolker, B., Walker, S., Christensen, R., Singmann, H., &  
517 Others. (2015). Lme4: Linear mixed-effects models using Eigen and S4 (Version  
518 1.1-7). 2014.
- 519 Bernard, H., Bili, R., Matsuda, I., Hanya, G., Wearn, O. R., Wong, A., & Ahmad, A. H.  
520 (2016). Species richness and distribution of primates in disturbed and converted  
521 forest landscapes in Northern Borneo. *Tropical Conservation Science*, 9(4),  
522 1940082916680104.
- 523 Bolt, L. M., Schreier, A. L., Voss, K. A., Sheehan, E. A., Barrickman, N. L., Pryor, N. P.,  
524 & Barton, M. C. (2018). The influence of anthropogenic edge effects on primate

- 525 populations and their habitat in a fragmented rainforest in Costa Rica. *Primates*,  
526 59(3):301–311.
- 527 Boyle, S. A., & Smith, A. T. (2010). Can landscape and species characteristics predict  
528 primate presence in forest fragments in the Brazilian Amazon? *Biological*  
529 *Conservation*, 143(5):1134–1143.
- 530 Campos, F. A., Jack, K. M., & Fedigan, L. M. (2015). Local and global climate effects on  
531 white-faced capuchin population growth and demography. *American Journal Of*  
532 *Physical Anthropology*, 156:100.
- 533 Campos, F. A., Bergstrom, M. L., Childers, A., Hogan, J. D., Jack, K. M., Melin, A. D.,  
534 Mosdossy, K. N., Myers, M. S., Parr, N. A., Sargeant, E., Schoof, V. A. M., &  
535 Fedigan, L.M. (2014). Drivers of home range characteristics across  
536 spatiotemporal scales in a Neotropical primate, *Cebus capucinus*. *Animal*  
537 *Behaviour*, 91:93-109.
- 538 Cavada, N., Barelli, C., Ciolli, M., & Rovero, F. (2016). Primates in human-modified and  
539 fragmented landscapes: The conservation relevance of modelling habitat and  
540 disturbance factors in density estimation. *PloS One*, 11(2), e0148289.
- 541 Crofoot, M. C. (2007). Mating and feeding competition in white-faced capuchins (*Cebus*  
542 *capucinus*): The importance of short- and long-term strategies. *Behaviour*,  
543 144(12):143-1495.
- 544 Cunha, A. A., Vieira, M. V., & Grelle, C. E. V. (2006). Preliminary observations on  
545 habitat, support use and diet in two non-native primates in an urban Atlantic  
546 forest fragment: The capuchin monkey (*Cebus* sp.) and the common marmoset

- 547 (*Callithrix jacchus*) in the Tijuca forest, Rio de Janeiro. *Urban Ecosystems*,  
548 9:351–359.
- 549 DeJong, T. M. (1975). A comparison of three diversity indices based on their  
550 components of richness and evenness. *Oikos*, 26:222.
- 551 Dexter, K. G., Pennington, T., Oliveira-Filho, A. T., Bueno, M. L., Silva de Miranda, P.  
552 L., & Neves, D. (2018). Inserting tropical dry forests into the discussion on biome  
553 transitions in the tropics. *Frontiers in Ecology and Evolution*,  
554 <https://doi.org/10.3389/fevo.2018.00104>
- 555 Di Bitetti, M. S. (2001). Home-range use by the tufted capuchin monkey (*Cebus apella*  
556 *nigritus*) in a subtropical rainforest of Argentina. *Journal of Zoology*, 253(1):33–  
557 45.
- 558 Didham, R. K., Barker, G. M., Bartlam, S., Deakin, E. L., Denmead, L. H., Fisk, L. M., ...  
559 Schipper, L. A. (2015). Agricultural intensification exacerbates spillover effects on  
560 soil biogeochemistry in adjacent forest remnants. *PloS One*, 10(1):e0116474.
- 561 Dryflor, K. B.-R., Delgado-Salinas, A., Dexter, K. G., Linares-Palomino, R., Oliveira-  
562 Filho, A., Prado, D., ... Others. (2016). Plant diversity patterns and their  
563 conservation implications in neotropical dry forests. *Science*, 353:1383–1387.
- 564 Estrada, A., Garber, P. A., Mittermeier, R. A., Wich, S., Gouveia, S., Dobrovolski, R., ...  
565 Setiawan, A. (2018). Primates in peril: the significance of Brazil, Madagascar,  
566 Indonesia and the Democratic Republic of the Congo for global primate  
567 conservation. *PeerJ*, 6:e4869.
- 568 FAO. (2004). *National Forest Inventory Field Manual: Template*. Food and Agriculture  
569 Organization (FAO) of the United Nations, Rome.

- 570 Fedigan, L. M., & Jack, K. (2001). Neotropical primates in a regenerating Costa Rican  
571 dry forest: A comparison of howler and capuchin population patterns.  
572 *International Journal of Primatology*, 22(5):689–713.
- 573 Fedigan, L. M. & Jack, K. M. (2012). Tracking neotropical monkeys in Santa Rosa:  
574 Lessons from a generating Costa Rican dry forest. In: P. M. Kappeler & D. P.  
575 Watts (Eds.), *Long-Term Field Studies of Primates*. Berlin: Springer-Verlag.
- 576 Fedigan, L. M., Rose, L. M., & Avila, R. M. (1996). See how they grow: tracking  
577 capuchin monkey (*Cebus capucinus*) populations in a regenerating Costa Rican  
578 dry forest. *Adaptive Radiations of Neotropical Primates*, 289–307.
- 579 Fedigan, L. M., Rose, L. M., & Avila, R. M. (1998). Growth of mantled howler groups in  
580 a regenerating Costa Rican dry forest. *International Journal of Primatology*,  
581 19(3):405–432.
- 582 Fleagle, J. G., & Mittermeier, R. A. (1980). Locomotor behavior, body size, and  
583 comparative ecology of seven Surinam monkeys. *American Journal of Physical*  
584 *Anthropology*, 52(3):301–314.
- 585 Ford, S. M., & Davis, L. C. (1992). Systematics and body size: implications for feeding  
586 adaptations in New World monkeys. *American Journal of Physical Anthropology*,  
587 88(4):415–468.
- 588 Gillespie, T. W., Grijalva, A., & Farris, C. N. (2000). Diversity, composition, and structure  
589 of tropical dry forests in Central America. *Plant Ecology*, 147(1):37–47.
- 590 Gogarten, J. F., Brown, L. M., Chapman, C. A., Cords, M. A., Doran-Sheehy, D.,  
591 Fedigan, L. M., Grine, F. E., Perry, S., Pusey, A. E., Sterck, E. H. M., Wich, S. A.,  
592 & Wright, P. C. (2012). Seasonal mortality patterns in non-human primates:

- 593 Implications for variation in selection pressures across environments. *Evolution*,  
594 66(10):3252-3266.
- 595 Harper, K. A., Macdonald, S. E., Burton, P. J., Chen, J., Brosofske, K. D., Saunders, S.  
596 C., ... Esseen, P.-A. (2005). Edge Influence on forest structure and composition  
597 in fragmented landscapes. *Conservation Biology*, 19(3):768–782.
- 598 Harris, L. D. (1988). Edge effects and conservation of biotic diversity. *Conservation*  
599 *Biology*, 2(4):330–332.
- 600 Heltne, P. G., Turner, D. C., & Scott, N. J., Jr. (1976). Comparison of census data on  
601 *Alouatta villosa* (= *palliata*) from Costa Rica and Panama. In R. J. Thorington &  
602 P. G. Heltne (Eds.), *Neotropical Primates: Field Studies and Conservation* (10-  
603 19). Washington, D. C.: National Academy of Sciences.
- 604 Hogan, J. D., Fedigan, L. M., Hiramatsu, C., Kawamura, S., & Melin, A. D. (2018).  
605 Trichromatic perception of flower colour improves resource detection among New  
606 World monkeys. *Scientific Reports*, 8:10883.
- 607 Horwich, R. H. (1998). Effective Solutions for Howler Conservation. *International*  
608 *Journal of Primatology*, 19(3), 579–598.
- 609 Janzen, D. H. (1988). Management of habitat fragments in a tropical dry forest: growth.  
610 *Annals of the Missouri Botanical Garden*, 75(1):1-5-116.
- 611 Kalacska, M., Sanchez-Azofeifa, G. A., Calvo-Alvarado, J. C., Quesada, M., Rivard, B.,  
612 & Janzen, D. H. (2004). Species composition, similarity and diversity in three  
613 successional stages of a seasonally dry tropical forest. *Forest Ecology and*  
614 *Management*, 200(1), 227–247.



- 615 Kulp, J., & Heymann, E. W. (2015). Ranging, activity budget, and diet composition of  
616 red titi monkeys (*Callicebus cupreus*) in primary forest and forest edge. *Primates*,  
617 *56*(3), 273–278.
- 618 Laurance, W. F., Nascimento, H. E. M., Laurance, S. G., Andrade, A., Ewers, R. M.,  
619 Harms, K. E., ... Ribeiro, J. E. (2007). Habitat fragmentation, variable edge  
620 effects, and the landscape-divergence hypothesis. *PloS One*, *2*(10), e1017.
- 621 Lehman, S. M., Rajaonson, A., & Day, S. (2006). Edge Effects on the Density of  
622 *Cheirogaleus major*. *International Journal of Primatology*, *27*(6), 1569–1588.
- 623 Lenz, B. B., Jack, K. M., & Spironello, W. R. (2014). Edge effects in the primate  
624 community of the biological dynamics of forest fragments project, Amazonas,  
625 Brazil. *American Journal of Physical Anthropology*, *155*:436–446.
- 626 Lins, P. G. A. de S., & Ferreira, R. G. (2019). Competition during sugarcane crop raiding  
627 by blond capuchin monkeys (*Sapajus flavius*). *Primates*, *60*(1), 81–91.
- 628 Lynch Alfaro, J. W., Izar, P., & Ferreira, R. G. (2014). Capuchin monkey research  
629 priorities and urgent issues. *American Journal of Primatology*, *76*:705-720.
- 630 Melin, A. D., Chiou, K. L, Walco, E. R., Bergstrom, M. L., Kawamura, S., & Fedigan, L.  
631 M. (2017). Trichromacy increases fruit intake rates of wild capuchins (*Cebus*  
632 *capucinus imitator*). *PNAS*, *114*(39):10402-10407.
- 633 Miles, L., Newton, A. C., DeFries, R. S., Ravilious, C., May, I., Blyth, S., ... Gordon, J.  
634 E. (2006). A global overview of the conservation status of tropical dry forests.  
635 *Journal of Biogeography*, *33*(3), 491–505.
- 636 Milton, K., & Giacalone, J. (2014). Differential effects of unusual climatic stress on  
637 capuchin (*Cebus capucinus*) and howler monkey (*Alouatta palliata*) populations

- 638 on Barro Colorado Island, Panama. *American Journal of Primatology*, 76(3),  
639 249–261.
- 640 Panger, M. A., Perry, S., Rose, L., Gros-Louis, J., Vogel, E., Mackinnon, K. C., & Baker,  
641 M. (2002). Cross-site differences in foraging behavior of white-faced capuchins  
642 (*Cebus capucinus*). *American Journal of Physical Anthropology*, 119(1):52-66.
- 643 Perry, S. (1996). Intergroup encounters in wild white-faced capuchins (*Cebus*  
644 *capucinus*). *International Journal of Primatology*, 17(3):309-330.
- 645 Perry, S. (2012). The behavior of wild white-faced capuchins: Demography, life history,  
646 social relationships, and communication. *Advances in the Study of Behavior*,  
647 44:135-181.
- 648 Pielou, E. C. (1969). *An Introduction to Mathematical Ecology*. New York, NY: Wiley  
649 Interscience.
- 650 Pruetz, J. D., & Leason, H. C. (2002). Survey of three primate species in forest  
651 fragments at La Suerte Biological Field Station, Costa Rica. *Neotropical*  
652 *Primates*, 10(1), 4–9.
- 653 R Core Team. (2016). R: A Language and Environment for Statistical Computing.  
654 Retrieved from <https://www.R-project.org/>
- 655 Ries, L., Fletcher, R. J., Battin, J., & Sisk, T. D. (2004). Ecological responses to habitat  
656 edges: Mechanisms, models, and variability explained. *Annual Review of*  
657 *Ecology, Evolution, and Systematics*, 35(1), 491–522.
- 658 Rose, L. M. (1994). Sex differences in diet and foraging behavior in white-faced  
659 capuchins (*Cebus capucinus*). *International Journal of Primatology*, 15(1), 95–  
660 114.

- 661 RStudio Team. (2016). RStudio: Integrated Development Environment for R. Retrieved  
662 from <http://www.rstudio.com/>
- 663 Ruiz-Garcia, M., Castillo, M.I., Ledezma, A., Leguizamon, N., Sánchez, R., Chinchilla,  
664 M., Gutierrez-Espeleta, G. A. (2012). Molecular systematics and phylogeography  
665 of *Cebus capucinus* (Cebidae, Primates) in Colombia and Costa Rica by means  
666 of the mitochondrial COII gene. *American Journal of Primatology*, 74(4):366-80.
- 667 Saunders, D. A., Hobbs, R. J., & Margules, C. R. (1991). Biological Consequences of  
668 Ecosystem Fragmentation: A Review. *Conservation Biology*, 5:18–32.  
669 <https://doi.org/10.1111/j.1523-1739.1991.tb00384.x>
- 670 Shannon, C. E., & Weaver, W. (1949). *The mathematical theory of communication*.  
671 Urbana, IL. University of Illinois Press.
- 672 Spellerberg, I. F. (2005). *Monitoring Ecological Change*. Cambridge University Press.
- 673 Thomas, O. (1903). New mammals from Chiriqui. *Journal of Natural History*, 11(64):  
674 376-382.
- 675 Vogel, E. R. (2004). The ecological basis of aggression in white-faced capuchin  
676 monkeys, *Cebus capucinus*, in a Costa Rican dry forest. (Doctoral dissertation).  
677 Stony Brook University, NY.
- 678 Wickham, H. (2009). ggplot2: Elegant Graphics for Data Analysis. Retrieved from  
679 <http://ggplot2.org>
- 680 Williams-Guillén, K., Hagell, S., Otterstrom, S., Spehar, S., & Gómez, C. (2013).  
681 Primate populations in fragmented tropical dry forest landscapes in Southwestern  
682 Nicaragua. In L. Barrett (Ed.), *Primates in Fragments* (105–120). New York, NY:  
683 Springer.
